# Supplementary material for: Does the Cosmopolitan Diatom Gomphonema parvulum (Kützing) Kützing Have a Biogeography?
Source: PubMed Central journal article supplement (PMC3906111; doi:10.1371/journal.pone.0086885), 2014-01-29
Supplement: pone.0086885.s001.pdf [file pone.0086885.s001.pdf]

**B TREES OF INDIVIDUAL GENE MARKERS (18SV4, ITS, *RBCL*)**

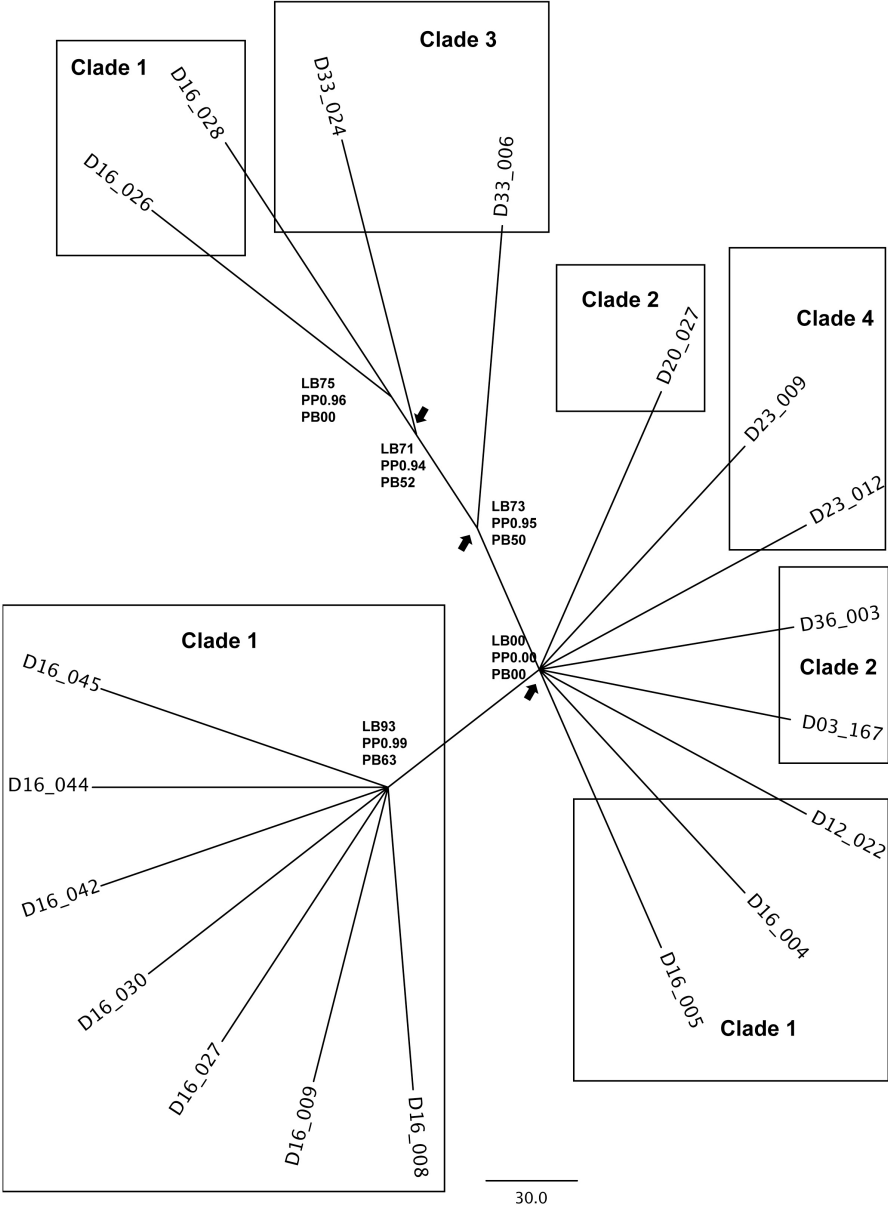

**B1** 18SV4: MP strict consensus tree, LB, PB and PP given, black arrows indicate SAMS support, clades named according to Fig. 7.

**B2 ITS:** MP strict consensus tree, LB, PB and PP given, black arrows indicate SAMS support, clades named according to Fig. 7.

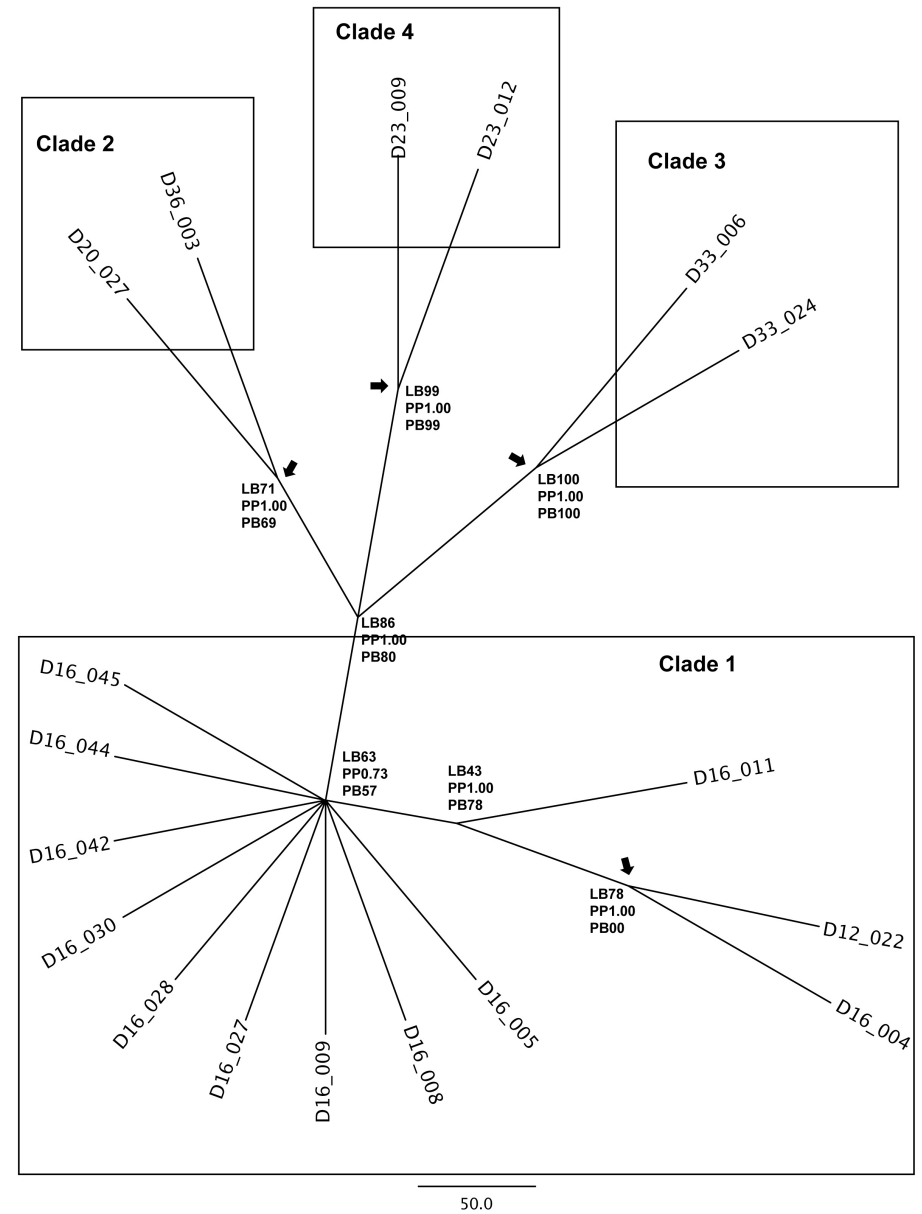

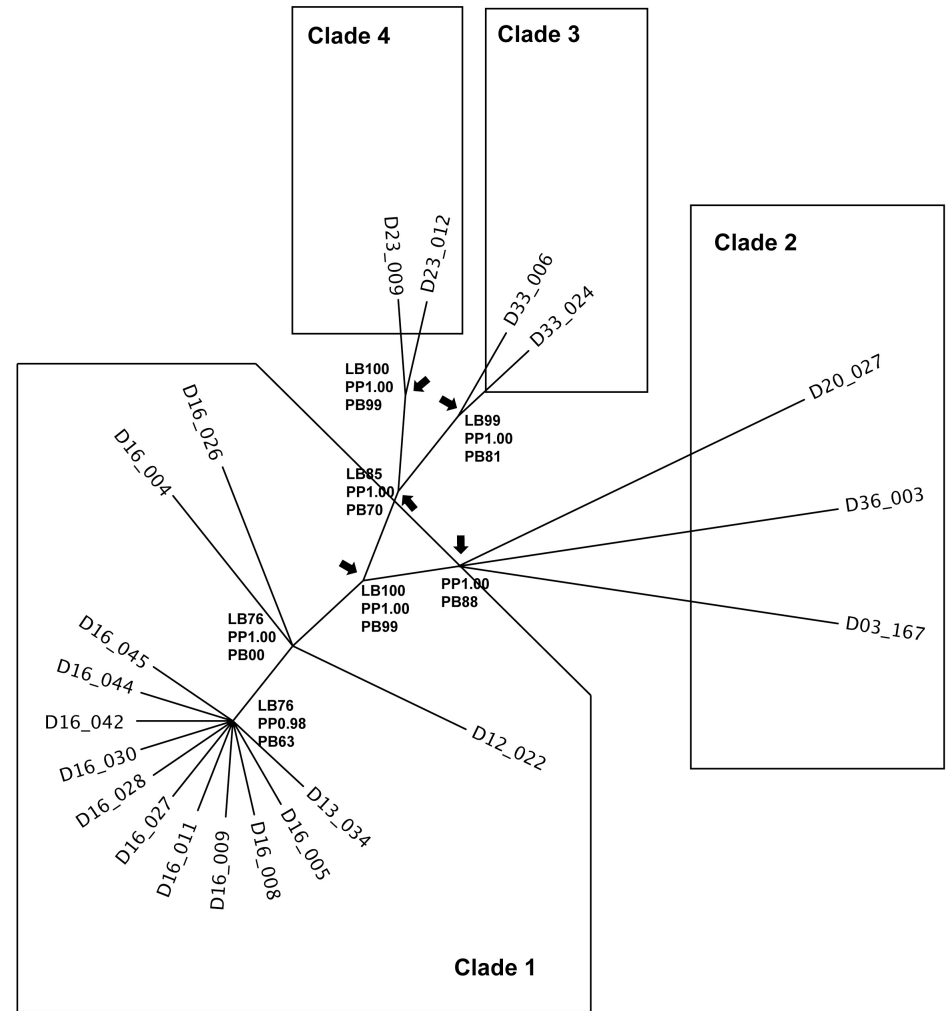

**B3** rbcL: MP strict consensus tree, LB, PB and PP given, black arrows indicate SAMS support, clades named according to Fig. 7

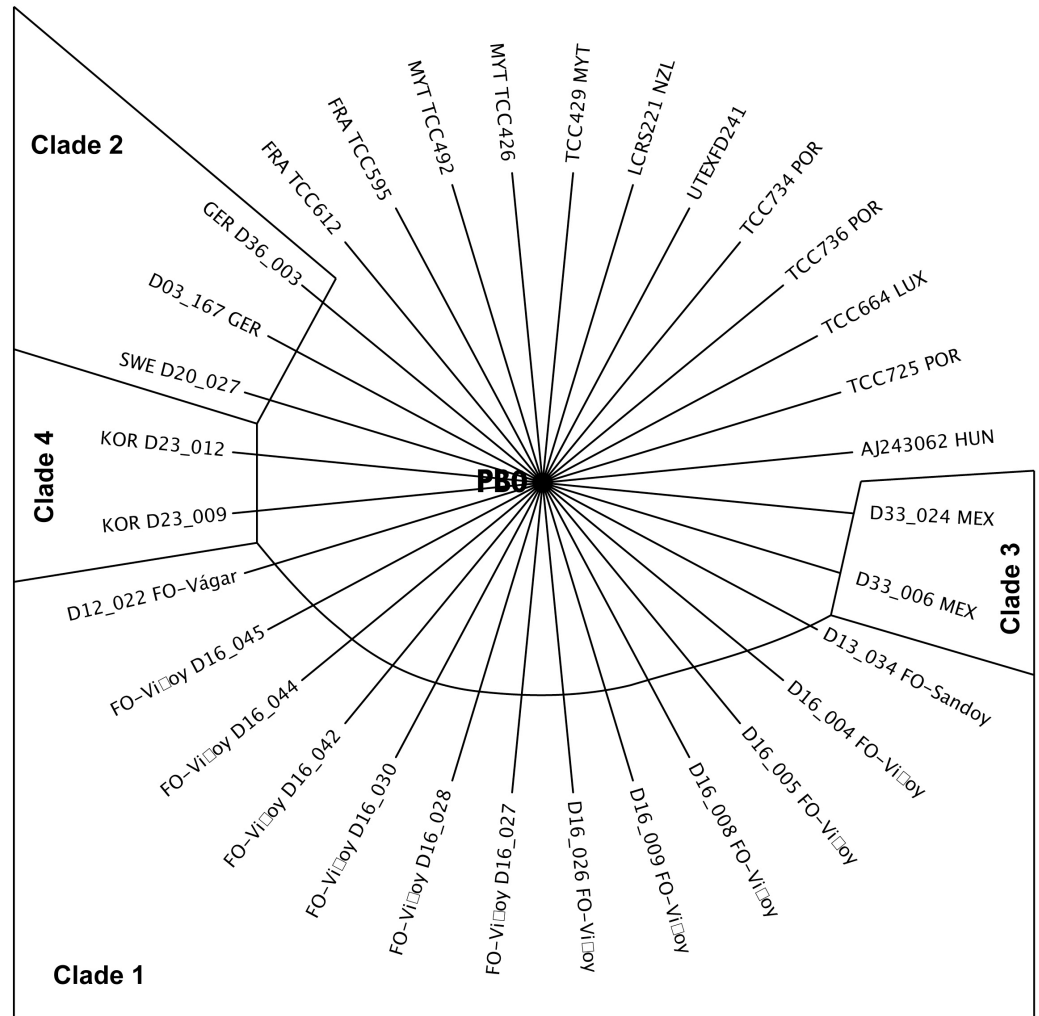

**B4** 18SV4 with Genbank sequences: Bootstrapped (10 000 replicates) MP strict consensus tree, PB given, black arrows indicate SAMS support, clades named according to Fig. 7

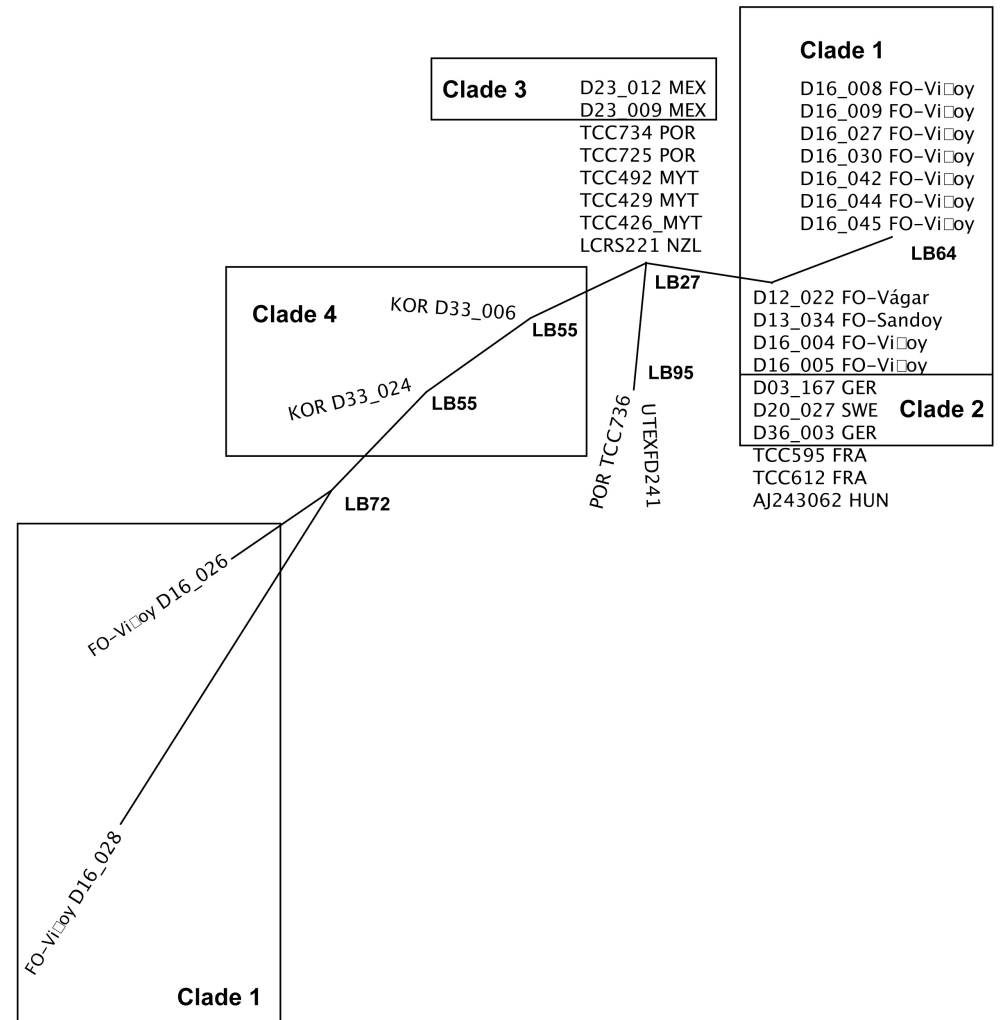

**B5** 18SV4 with Genbank sequences: Bootstrapped (10 000 replicates) RAxML best scoring ML tree, LB given, black arrow indicate SAMS support, clades named according to Fig. 7

0.0020



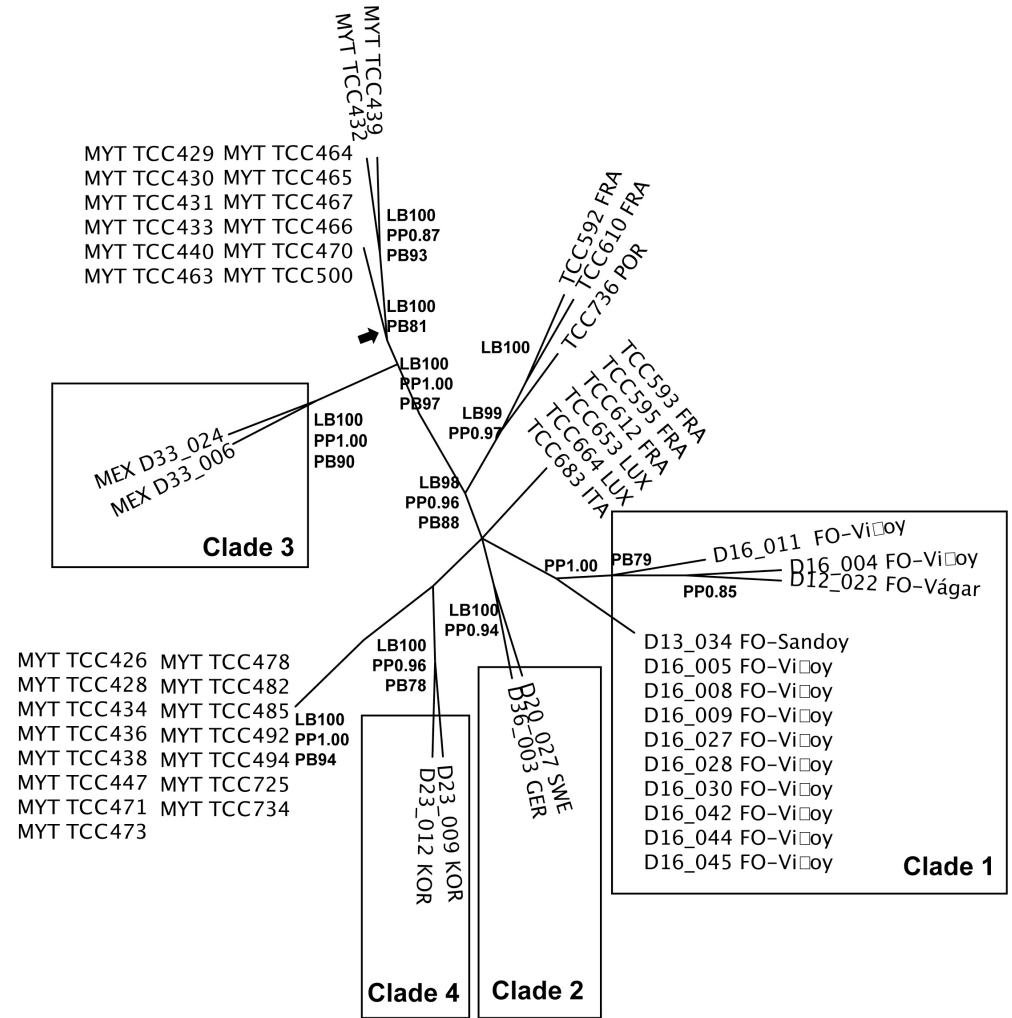

**B7 ITS with Genbank: MP strict consensus tree, LB, PB and PP given, black arrows indicate SAMS support, clades named according to Fig. 7.**



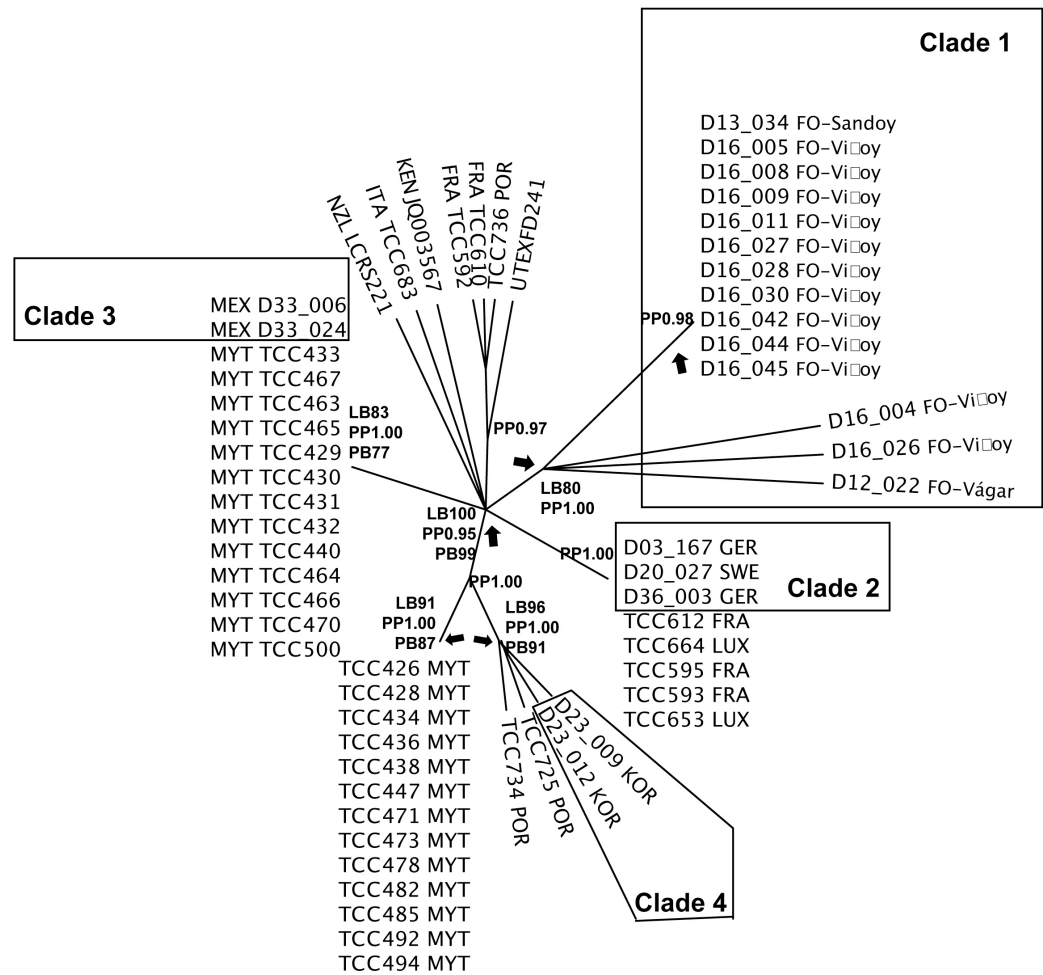

**B8** *rbcL* with Genbank: MP strict consensus tree, LB, PB and PP given, black arrows indicate SAMS support, clades named according to Fig. 7.

# C UNCORRECTED P-DISTANCES

## C1 18SV4

| Strain 1 | Strain 2 | uncorrected p-distance | Strain 1 | Strain 2 | uncorrected p-distance | Strain 1 | Strain 2 | uncorrected p-distance | Strain 1 | Strain 2 | uncorrected p-distance | Strain 1 | Strain 2 | uncorrected p-distance | Strain 1 | Strain 2 | uncorrected p-distance | Strain 1 | Strain 2 | uncorrected p-distance |         |         |        |
|----------|----------|------------------------|----------|----------|------------------------|----------|----------|------------------------|----------|----------|------------------------|----------|----------|------------------------|----------|----------|------------------------|----------|----------|------------------------|---------|---------|--------|
| D12 022  | D03 167  | 0.0000                 | D16 027  | D16 004  | 0.0027                 | D16 042  | D12 022  | 0.0027                 | D16 045  | D16 005  | 0.0027                 | D23 009  | D12 022  | 0.0027                 | D23 012  | D16 042  | 0.0053                 | D33 024  | D16 004  | 0.0080                 | D36 003 | D16 028 | 0.0133 |
| D16 004  | D03 167  | 0.0000                 | D16 027  | D16 005  | 0.0027                 | D16 042  | D16 004  | 0.0027                 | D16 045  | D16 008  | 0.0000                 | D23 009  | D16 004  | 0.0027                 | D23 012  | D16 044  | 0.0053                 | D33 024  | D16 005  | 0.0080                 | D36 003 | D16 030 | 0.0027 |
| D16 004  | D12 022  | 0.0000                 | D16 027  | D16 008  | 0.0000                 | D16 042  | D16 005  | 0.0027                 | D16 045  | D16 009  | 0.0000                 | D23 009  | D16 005  | 0.0027                 | D23 012  | D16 045  | 0.0053                 | D33 024  | D16 008  | 0.0106                 | D36 003 | D16 042 | 0.0027 |
| D16 005  | D03 167  | 0.0000                 | D16 027  | D16 009  | 0.0000                 | D16 042  | D16 008  | 0.0000                 | D16 045  | D16 026  | 0.0106                 | D23 009  | D16 008  | 0.0053                 | D23 012  | D20 027  | 0.0027                 | D33 024  | D16 009  | 0.0106                 | D36 003 | D16 044 | 0.0027 |
| D16 005  | D12 022  | 0.0000                 | D16 027  | D16 026  | 0.0106                 | D16 042  | D16 009  | 0.0000                 | D16 045  | D16 027  | 0.0000                 | D23 009  | D16 009  | 0.0053                 | D23 012  | D23 009  | 0.0000                 | D33 024  | D16 026  | 0.0053                 | D36 003 | D16 045 | 0.0027 |
| D16 005  | D16 004  | 0.0000                 | D16 028  | D03 167  | 0.0133                 | D16 042  | D16 026  | 0.0106                 | D16 045  | D16 028  | 0.0159                 | D23 009  | D16 026  | 0.0106                 | D33 006  | D03 167  | 0.0053                 | D33 024  | D16 027  | 0.0106                 | D36 003 | D20 027 | 0.0000 |
| D16 008  | D03 167  | 0.0027                 | D16 028  | D12 022  | 0.0133                 | D16 042  | D16 027  | 0.0000                 | D16 045  | D16 030  | 0.0000                 | D23 009  | D16 027  | 0.0053                 | D33 006  | D12 022  | 0.0053                 | D33 024  | D16 028  | 0.0106                 | D36 003 | D23 009 | 0.0027 |
| D16 008  | D12 022  | 0.0027                 | D16 028  | D16 004  | 0.0133                 | D16 042  | D16 028  | 0.0159                 | D16 045  | D16 042  | 0.0000                 | D23 009  | D16 028  | 0.0159                 | D33 006  | D16 004  | 0.0053                 | D33 024  | D16 030  | 0.0106                 | D36 003 | D23 012 | 0.0027 |
| D16 008  | D16 004  | 0.0027                 | D16 028  | D16 005  | 0.0133                 | D16 042  | D16 030  | 0.0000                 | D16 045  | D16 044  | 0.0000                 | D23 009  | D16 030  | 0.0053                 | D33 006  | D16 005  | 0.0053                 | D33 024  | D16 042  | 0.0106                 | D36 003 | D33 006 | 0.0053 |
| D16 008  | D16 005  | 0.0027                 | D16 028  | D16 008  | 0.0159                 | D16 044  | D03 167  | 0.0027                 | D20 027  | D03 167  | 0.0000                 | D23 009  | D16 042  | 0.0053                 | D33 006  | D16 008  | 0.0080                 | D33 024  | D16 044  | 0.0106                 | D36 003 | D33 024 | 0.0080 |
| D16 009  | D03 167  | 0.0027                 | D16 028  | D16 009  | 0.0159                 | D16 044  | D12 022  | 0.0027                 | D20 027  | D12 022  | 0.0000                 | D23 009  | D16 044  | 0.0053                 | D33 006  | D16 009  | 0.0080                 | D33 024  | D16 045  | 0.0106                 |         |         |        |
| D16 009  | D12 022  | 0.0027                 | D16 028  | D16 026  | 0.0106                 | D16 044  | D16 004  | 0.0027                 | D20 027  | D16 004  | 0.0000                 | D23 009  | D16 045  | 0.0053                 | D33 006  | D16 026  | 0.0080                 | D33 024  | D20 027  | 0.0080                 |         |         |        |
| D16 009  | D16 004  | 0.0027                 | D16 028  | D16 027  | 0.0159                 | D16 044  | D16 005  | 0.0027                 | D20 027  | D16 005  | 0.0000                 | D23 009  | D20 027  | 0.0027                 | D33 006  | D16 027  | 0.0080                 | D33 024  | D23 009  | 0.0053                 |         |         |        |
| D16 009  | D16 005  | 0.0027                 | D16 030  | D03 167  | 0.0027                 | D16 044  | D16 008  | 0.0000                 | D20 027  | D16 008  | 0.0027                 | D23 012  | D03 167  | 0.0027                 | D33 006  | D16 028  | 0.0133                 | D33 024  | D23 012  | 0.0053                 |         |         |        |
| D16 009  | D16 008  | 0.0000                 | D16 030  | D12 022  | 0.0027                 | D16 044  | D16 009  | 0.0000                 | D20 027  | D16 009  | 0.0027                 | D23 012  | D12 022  | 0.0027                 | D33 006  | D16 030  | 0.0080                 | D33 024  | D16 030  | 0.0080                 | D36 003 | D03 167 | 0.0000 |
| D16 026  | D03 167  | 0.0080                 | D16 030  | D16 004  | 0.0027                 | D16 044  | D16 026  | 0.0106                 | D20 027  | D16 026  | 0.0080                 | D23 012  | D16 004  | 0.0027                 | D33 006  | D16 042  | 0.0080                 | D36 003  | D12 022  | 0.0000                 |         |         |        |
| D16 026  | D12 022  | 0.0080                 | D16 030  | D16 005  | 0.0027                 | D16 044  | D16 027  | 0.0000                 | D20 027  | D16 027  | 0.0027                 | D23 012  | D16 005  | 0.0027                 | D33 006  | D16 044  | 0.0080                 | D36 003  | D12 022  | 0.0000                 |         |         |        |
| D16 026  | D16 004  | 0.0080                 | D16 030  | D16 008  | 0.0000                 | D16 044  | D16 028  | 0.0159                 | D20 027  | D16 028  | 0.0133                 | D23 012  | D16 008  | 0.0053                 | D33 006  | D16 045  | 0.0080                 | D36 003  | D16 004  | 0.0000                 |         |         |        |
| D16 026  | D16 005  | 0.0080                 | D16 030  | D16 009  | 0.0000                 | D16 044  | D16 030  | 0.0000                 | D20 027  | D16 030  | 0.0027                 | D23 012  | D16 009  | 0.0053                 | D33 006  | D20 027  | 0.0053                 | D36 003  | D16 005  | 0.0000                 |         |         |        |
| D16 026  | D16 008  | 0.0106                 | D16 030  | D16 026  | 0.0106                 | D16 044  | D16 042  | 0.0000                 | D20 027  | D16 042  | 0.0027                 | D23 012  | D16 026  | 0.0106                 | D33 006  | D23 009  | 0.0027                 | D36 003  | D16 008  | 0.0027                 |         |         |        |
| D16 026  | D16 009  | 0.0106                 | D16 030  | D16 027  | 0.0000                 | D16 045  | D03 167  | 0.0027                 | D20 027  | D16 044  | 0.0027                 | D23 012  | D16 027  | 0.0053                 | D33 006  | D23 012  | 0.0027                 | D36 003  | D16 009  | 0.0027                 |         |         |        |
| D16 027  | D03 167  | 0.0027                 | D16 030  | D16 028  | 0.0159                 | D16 045  | D12 022  | 0.0027                 | D20 027  | D16 045  | 0.0027                 | D23 012  | D16 028  | 0.0159                 | D33 024  | D03 167  | 0.0080                 | D36 003  | D16 026  | 0.0080                 |         |         |        |
| D16 027  | D12 022  | 0.0027                 | D16 042  | D03 167  | 0.0027                 | D16 045  | D16 004  | 0.0027                 | D23 009  | D03 167  | 0.0027                 | D23 012  | D16 030  | 0.0053                 | D33 024  | D12 022  | 0.0080                 | D36 003  | D16 027  | 0.0027                 |         |         |        |

C2 ITS

| Strain 1 | Strain 2 | uncorrected p-distance | Strain 1 | Strain 2 | uncorrected p-distance | Strain 1 | Strain 2 | uncorrected p-distance | Strain 1 | Strain 2 | uncorrected p-distance | Strain 1 | Strain 2 | uncorrected p-distance | Strain 1 | Strain 2 | uncorrected p-distance |
|----------|----------|------------------------|----------|----------|------------------------|----------|----------|------------------------|----------|----------|------------------------|----------|----------|------------------------|----------|----------|------------------------|
| D16 004  | D12 022  | 0.02401                | D16 030  | D16 004  | 0.01715                | D16 044  | D16 042  | 0.00000                | D23 009  | D12 022  | 0.04979                | D23 012  | D16 045  | 0.02058                | D36 003  | D16 011  | 0.03951                |
| D16 005  | D12 022  | 0.02401                | D16 030  | D16 005  | 0.00343                | D16 045  | D12 022  | 0.02058                | D23 009  | D16 004  | 0.04628                | D23 012  | D20 027  | 0.01891                | D36 003  | D16 027  | 0.01371                |
| D16 005  | D16 004  | 0.01372                | D16 030  | D16 008  | 0.00000                | D16 045  | D16 004  | 0.01715                | D23 009  | D16 005  | 0.03258                | D23 012  | D23 009  | 0.01195                | D36 003  | D16 030  | 0.01371                |
| D16 008  | D12 022  | 0.02058                | D16 030  | D16 009  | 0.00000                | D16 045  | D16 005  | 0.00343                | D23 009  | D16 008  | 0.02917                | D33 006  | D12 022  | 0.04505                | D36 003  | D16 042  | 0.01371                |
| D16 008  | D16 004  | 0.01715                | D16 030  | D16 011  | 0.02916                | D16 045  | D16 008  | 0.00000                | D23 009  | D16 009  | 0.02917                | D33 006  | D16 004  | 0.04330                | D36 003  | D16 044  | 0.01371                |
| D16 008  | D16 005  | 0.00343                | D16 030  | D16 027  | 0.00000                | D16 045  | D16 009  | 0.00000                | D23 009  | D16 011  | 0.05836                | D33 006  | D16 005  | 0.02955                | D36 003  | D16 045  | 0.01371                |
| D16 009  | D12 022  | 0.02058                | D16 042  | D12 022  | 0.02058                | D16 045  | D16 011  | 0.02916                | D23 009  | D16 027  | 0.02917                | D33 006  | D16 008  | 0.02606                | D36 003  | D20 027  | 0.00513                |
| D16 009  | D16 004  | 0.01715                | D16 042  | D16 004  | 0.01715                | D16 045  | D16 027  | 0.00000                | D23 009  | D16 030  | 0.02917                | D33 006  | D16 009  | 0.02606                | D36 003  | D23 009  | 0.03266                |
| D16 009  | D16 005  | 0.00343                | D16 042  | D16 005  | 0.00343                | D16 045  | D16 030  | 0.00000                | D23 009  | D16 042  | 0.02917                | D33 006  | D16 011  | 0.05583                | D36 003  | D23 012  | 0.02407                |
| D16 009  | D16 008  | 0.00000                | D16 042  | D16 008  | 0.00000                | D16 045  | D16 042  | 0.00000                | D23 009  | D16 044  | 0.02917                | D33 006  | D16 027  | 0.02606                | D36 003  | D33 006  | 0.02940                |
| D16 011  | D12 022  | 0.04631                | D16 042  | D16 009  | 0.00000                | D16 045  | D16 044  | 0.00000                | D23 009  | D16 045  | 0.02917                | D33 006  | D16 030  | 0.02606                |          |          |                        |
| D16 011  | D16 004  | 0.04288                | D16 042  | D16 011  | 0.02916                | D20 027  | D12 022  | 0.02913                | D23 009  | D20 027  | 0.02749                | D33 006  | D16 042  | 0.02606                |          |          |                        |
| D16 011  | D16 005  | 0.03259                | D16 042  | D16 027  | 0.00000                | D20 027  | D16 004  | 0.02568                | D23 012  | D12 022  | 0.04121                | D33 006  | D16 044  | 0.02606                |          |          |                        |
| D16 011  | D16 008  | 0.02916                | D16 042  | D16 030  | 0.00000                | D20 027  | D16 005  | 0.01198                | D23 012  | D16 004  | 0.03769                | D33 006  | D16 045  | 0.02606                |          |          |                        |
| D16 011  | D16 009  | 0.02916                | D16 044  | D12 022  | 0.02058                | D20 027  | D16 008  | 0.00856                | D23 012  | D16 005  | 0.02399                | D33 006  | D20 027  | 0.02428                |          |          |                        |
| D16 027  | D12 022  | 0.02058                | D16 044  | D16 004  | 0.01715                | D20 027  | D16 009  | 0.00856                | D23 012  | D16 008  | 0.02058                | D33 006  | D23 009  | 0.04518                |          |          |                        |
| D16 027  | D16 004  | 0.01715                | D16 044  | D16 005  | 0.00343                | D20 027  | D16 011  | 0.03780                | D23 012  | D16 009  | 0.02058                | D33 006  | D23 012  | 0.03303                |          |          |                        |
| D16 027  | D16 005  | 0.00343                | D16 044  | D16 008  | 0.00000                | D20 027  | D16 027  | 0.00856                | D23 012  | D16 011  | 0.04977                | D36 003  | D12 022  | 0.03427                |          |          |                        |
| D16 027  | D16 008  | 0.00000                | D16 044  | D16 009  | 0.00000                | D20 027  | D16 030  | 0.00856                | D23 012  | D16 027  | 0.02058                | D36 003  | D16 004  | 0.03082                |          |          |                        |
| D16 027  | D16 009  | 0.00000                | D16 044  | D16 011  | 0.02916                | D20 027  | D16 042  | 0.00856                | D23 012  | D16 030  | 0.02058                | D36 003  | D16 005  | 0.01713                |          |          |                        |
| D16 027  | D16 011  | 0.02916                | D16 044  | D16 027  | 0.00000                | D20 027  | D16 044  | 0.00856                | D23 012  | D16 042  | 0.02058                | D36 003  | D16 008  | 0.01371                |          |          |                        |
| D16 030  | D12 022  | 0.02058                | D16 044  | D16 030  | 0.00000                | D20 027  | D16 045  | 0.00856                | D23 012  | D16 044  | 0.02058                | D36 003  | D16 009  | 0.01371                |          |          |                        |

C3 *rbcl*

| Strain 1 | Strain 2 | uncorrected p-distance | Strain 1 | Strain 2 | uncorrected p-distance | Strain 1 | Strain 2 | uncorrected p-distance | Strain 1 | Strain 2 | uncorrected p-distance | Strain 1 | Strain 2 | uncorrected p-distance | Strain 1 | Strain 2 | uncorrected p-distance | Strain 1 | Strain 2 | uncorrected p-distance |         |         |        |
|----------|----------|------------------------|----------|----------|------------------------|----------|----------|------------------------|----------|----------|------------------------|----------|----------|------------------------|----------|----------|------------------------|----------|----------|------------------------|---------|---------|--------|
| D12 022  | D03 167  | 0.0102                 | D16 026  | D16 004  | 0.0000                 | D16 030  | D16 004  | 0.0010                 | D16 044  | D16 009  | 0.0000                 | D20 027  | D16 008  | 0.0122                 | D23 012  | D03 167  | 0.0102                 | D33 006  | D16 027  | 0.0132                 | D33 024 | D23 009 | 0.0071 |
| D13 034  | D03 167  | 0.0112                 | D16 026  | D16 005  | 0.0010                 | D16 030  | D16 005  | 0.0000                 | D16 044  | D16 026  | 0.0010                 | D20 027  | D16 009  | 0.0122                 | D23 012  | D12 022  | 0.0142                 | D33 006  | D16 028  | 0.0132                 | D33 024 | D23 012 | 0.0071 |
| D13 034  | D12 022  | 0.0010                 | D16 026  | D16 008  | 0.0010                 | D16 030  | D16 008  | 0.0000                 | D16 044  | D16 027  | 0.0000                 | D20 027  | D16 026  | 0.0102                 | D23 012  | D13 034  | 0.0152                 | D33 006  | D16 030  | 0.0132                 | D33 024 | D33 006 | 0.0000 |
| D16 004  | D03 167  | 0.0102                 | D16 026  | D16 009  | 0.0010                 | D16 030  | D16 009  | 0.0000                 | D16 044  | D16 028  | 0.0000                 | D20 027  | D16 027  | 0.0122                 | D23 012  | D16 004  | 0.0142                 | D33 006  | D16 042  | 0.0132                 | D36 003 | D03 167 | 0.0000 |
| D16 004  | D12 022  | 0.0000                 | D16 027  | D03 167  | 0.0112                 | D16 030  | D16 026  | 0.0010                 | D16 044  | D16 030  | 0.0000                 | D20 027  | D16 028  | 0.0122                 | D23 012  | D16 005  | 0.0152                 | D33 006  | D16 044  | 0.0132                 | D36 003 | D12 022 | 0.0102 |
| D16 004  | D13 034  | 0.0010                 | D16 027  | D12 022  | 0.0010                 | D16 030  | D16 027  | 0.0000                 | D16 044  | D16 042  | 0.0000                 | D20 027  | D16 030  | 0.0122                 | D23 012  | D16 008  | 0.0152                 | D33 006  | D16 045  | 0.0132                 | D36 003 | D13 034 | 0.0112 |
| D16 005  | D03 167  | 0.0112                 | D16 027  | D13 034  | 0.0000                 | D16 030  | D16 028  | 0.0000                 | D16 045  | D03 167  | 0.0112                 | D20 027  | D16 042  | 0.0122                 | D23 012  | D16 009  | 0.0152                 | D33 006  | D20 027  | 0.0081                 | D36 003 | D16 004 | 0.0102 |
| D16 005  | D12 022  | 0.0010                 | D16 027  | D16 004  | 0.0010                 | D16 042  | D03 167  | 0.0112                 | D16 045  | D12 022  | 0.0010                 | D20 027  | D16 044  | 0.0122                 | D23 012  | D16 026  | 0.0132                 | D33 006  | D23 009  | 0.0071                 | D36 003 | D16 005 | 0.0112 |
| D16 005  | D13 034  | 0.0000                 | D16 027  | D16 005  | 0.0000                 | D16 042  | D12 022  | 0.0010                 | D16 045  | D13 034  | 0.0000                 | D20 027  | D16 045  | 0.0122                 | D23 012  | D16 027  | 0.0152                 | D33 006  | D23 012  | 0.0071                 | D36 003 | D16 008 | 0.0112 |
| D16 005  | D16 004  | 0.0010                 | D16 027  | D16 008  | 0.0000                 | D16 042  | D13 034  | 0.0000                 | D16 045  | D16 004  | 0.0010                 | D23 009  | D03 167  | 0.0102                 | D23 012  | D16 028  | 0.0152                 | D33 024  | D03 167  | 0.0061                 | D36 003 | D16 009 | 0.0112 |
| D16 008  | D03 167  | 0.0112                 | D16 027  | D16 009  | 0.0000                 | D16 042  | D16 004  | 0.0010                 | D16 045  | D16 005  | 0.0000                 | D23 009  | D12 022  | 0.0142                 | D23 012  | D16 030  | 0.0152                 | D33 024  | D12 022  | 0.0122                 | D36 003 | D16 026 | 0.0091 |
| D16 008  | D12 022  | 0.0010                 | D16 027  | D16 026  | 0.0010                 | D16 042  | D16 005  | 0.0000                 | D16 045  | D16 008  | 0.0000                 | D23 009  | D13 034  | 0.0152                 | D23 012  | D16 042  | 0.0152                 | D33 024  | D13 034  | 0.0132                 | D36 003 | D16 027 | 0.0112 |
| D16 008  | D13 034  | 0.0000                 | D16 028  | D03 167  | 0.0112                 | D16 042  | D16 008  | 0.0000                 | D16 045  | D16 009  | 0.0000                 | D23 009  | D16 004  | 0.0142                 | D23 012  | D16 044  | 0.0152                 | D33 024  | D16 004  | 0.0122                 | D36 003 | D16 028 | 0.0112 |
| D16 008  | D16 004  | 0.0010                 | D16 028  | D12 022  | 0.0010                 | D16 042  | D16 009  | 0.0000                 | D16 045  | D16 026  | 0.0010                 | D23 009  | D16 005  | 0.0152                 | D23 012  | D16 045  | 0.0152                 | D33 024  | D16 005  | 0.0132                 | D36 003 | D16 030 | 0.0112 |
| D16 008  | D16 005  | 0.0000                 | D16 028  | D13 034  | 0.0000                 | D16 042  | D16 026  | 0.0010                 | D16 045  | D16 027  | 0.0000                 | D23 009  | D16 008  | 0.0152                 | D23 012  | D20 027  | 0.0112                 | D33 024  | D16 008  | 0.0132                 | D36 003 | D16 042 | 0.0112 |
| D16 009  | D03 167  | 0.0112                 | D16 028  | D16 004  | 0.0010                 | D16 042  | D16 027  | 0.0000                 | D16 045  | D16 028  | 0.0000                 | D23 009  | D16 009  | 0.0152                 | D23 012  | D23 009  | 0.0000                 | D33 024  | D16 009  | 0.0132                 | D36 003 | D16 044 | 0.0112 |
| D16 009  | D12 022  | 0.0010                 | D16 028  | D16 005  | 0.0000                 | D16 042  | D16 028  | 0.0000                 | D16 045  | D16 030  | 0.0000                 | D23 009  | D16 026  | 0.0132                 | D33 006  | D03 167  | 0.0061                 | D33 024  | D16 026  | 0.0112                 | D36 003 | D16 045 | 0.0112 |
| D16 009  | D13 034  | 0.0000                 | D16 028  | D16 008  | 0.0000                 | D16 042  | D16 030  | 0.0000                 | D16 045  | D16 042  | 0.0000                 | D23 009  | D16 027  | 0.0152                 | D33 006  | D12 022  | 0.0122                 | D33 024  | D16 027  | 0.0132                 | D36 003 | D20 027 | 0.0020 |
| D16 009  | D16 004  | 0.0010                 | D16 028  | D16 009  | 0.0000                 | D16 044  | D03 167  | 0.0112                 | D16 045  | D16 044  | 0.0000                 | D23 009  | D16 028  | 0.0152                 | D33 006  | D13 034  | 0.0132                 | D33 024  | D16 028  | 0.0132                 | D36 003 | D23 009 | 0.0102 |
| D16 009  | D16 005  | 0.0000                 | D16 028  | D16 026  | 0.0010                 | D16 044  | D12 022  | 0.0010                 | D20 027  | D03 167  | 0.0020                 | D23 009  | D16 030  | 0.0152                 | D33 006  | D16 004  | 0.0122                 | D33 024  | D16 030  | 0.0132                 | D36 003 | D23 012 | 0.0102 |
| D16 009  | D16 008  | 0.0000                 | D16 028  | D16 027  | 0.0000                 | D16 044  | D13 034  | 0.0000                 | D20 027  | D12 022  | 0.0112                 | D23 009  | D16 042  | 0.0152                 | D33 006  | D16 005  | 0.0132                 | D33 024  | D16 042  | 0.0132                 | D36 003 | D33 006 | 0.0061 |
| D16 026  | D03 167  | 0.0091                 | D16 030  | D03 167  | 0.0112                 | D16 044  | D16 004  | 0.0010                 | D20 027  | D13 034  | 0.0122                 | D23 009  | D16 044  | 0.0152                 | D33 006  | D16 008  | 0.0132                 | D33 024  | D16 044  | 0.0132                 | D36 003 | D33 024 | 0.0061 |
| D16 026  | D12 022  | 0.0000                 | D16 030  | D12 022  | 0.0010                 | D16 044  | D16 005  | 0.0000                 | D20 027  | D16 004  | 0.0112                 | D23 009  | D16 045  | 0.0152                 | D33 006  | D16 009  | 0.0132                 | D33 024  | D16 045  | 0.0132                 |         |         |        |
| D16 026  | D13 034  | 0.0010                 | D16 030  | D13 034  | 0.0000                 | D16 044  | D16 008  | 0.0000                 | D20 027  | D16 005  | 0.0122                 | D23 009  | D20 027  | 0.0112                 | D33 006  | D16 026  | 0.0112                 | D33 024  | D20 027  | 0.0081                 |         |         |        |

C4 18SV, ITS and *rbcL* combined

| Strain 1 | Strain 2 | uncorrected p-distances | Strain 1 | Strain 2 | uncorrected p-distances | Strain 1 | Strain 2 | uncorrected p-distances | Strain 1 | Strain 2 | uncorrected p-distances | Strain 1 | Strain 2 | uncorrected p-distances |
|----------|----------|-------------------------|----------|----------|-------------------------|----------|----------|-------------------------|----------|----------|-------------------------|----------|----------|-------------------------|
| D16 004  | D12 022  | 0.0072                  | D16 042  | D16 004  | 0.0062                  | D16 045  | D16 044  | 0.0000                  | D23 012  | D12 022  | 0.0200                  | D33 006  | D20 027  | 0.0124                  |
| D16 005  | D12 022  | 0.0077                  | D16 042  | D16 005  | 0.0015                  | D20 027  | D12 022  | 0.0144                  | D23 012  | D16 004  | 0.0190                  | D33 006  | D23 009  | 0.0175                  |
| D16 005  | D16 004  | 0.0046                  | D16 042  | D16 008  | 0.0000                  | D20 027  | D16 004  | 0.0134                  | D23 012  | D16 005  | 0.0154                  | D33 006  | D23 012  | 0.0139                  |
| D16 008  | D12 022  | 0.0072                  | D16 042  | D16 009  | 0.0000                  | D20 027  | D16 005  | 0.0098                  | D23 012  | D16 008  | 0.0149                  | D36 003  | D12 022  | 0.0154                  |
| D16 008  | D16 004  | 0.0062                  | D16 042  | D16 027  | 0.0000                  | D20 027  | D16 008  | 0.0092                  | D23 012  | D16 009  | 0.0149                  | D36 003  | D16 004  | 0.0144                  |
| D16 008  | D16 005  | 0.0015                  | D16 042  | D16 030  | 0.0000                  | D20 027  | D16 009  | 0.0092                  | D23 012  | D16 027  | 0.0149                  | D36 003  | D16 005  | 0.0108                  |
| D16 009  | D12 022  | 0.0072                  | D16 044  | D12 022  | 0.0072                  | D20 027  | D16 027  | 0.0092                  | D23 012  | D16 030  | 0.0149                  | D36 003  | D16 008  | 0.0103                  |
| D16 009  | D16 004  | 0.0062                  | D16 044  | D16 004  | 0.0062                  | D20 027  | D16 030  | 0.0092                  | D23 012  | D16 042  | 0.0149                  | D36 003  | D16 009  | 0.0103                  |
| D16 009  | D16 005  | 0.0015                  | D16 044  | D16 005  | 0.0015                  | D20 027  | D16 042  | 0.0092                  | D23 012  | D16 044  | 0.0149                  | D36 003  | D16 027  | 0.0103                  |
| D16 009  | D16 008  | 0.0000                  | D16 044  | D16 008  | 0.0000                  | D20 027  | D16 044  | 0.0092                  | D23 012  | D16 045  | 0.0149                  | D36 003  | D16 030  | 0.0103                  |
| D16 027  | D12 022  | 0.0072                  | D16 044  | D16 009  | 0.0000                  | D20 027  | D16 045  | 0.0092                  | D23 012  | D20 027  | 0.0118                  | D36 003  | D16 042  | 0.0103                  |
| D16 027  | D16 004  | 0.0062                  | D16 044  | D16 027  | 0.0000                  | D23 009  | D12 022  | 0.0226                  | D23 012  | D23 009  | 0.0036                  | D36 003  | D16 044  | 0.0103                  |
| D16 027  | D16 005  | 0.0015                  | D16 044  | D16 030  | 0.0000                  | D23 009  | D16 004  | 0.0216                  | D33 006  | D12 022  | 0.0206                  | D36 003  | D16 045  | 0.0103                  |
| D16 027  | D16 008  | 0.0000                  | D16 044  | D16 042  | 0.0000                  | D23 009  | D16 005  | 0.0180                  | D33 006  | D16 004  | 0.0201                  | D36 003  | D20 027  | 0.0026                  |
| D16 027  | D16 009  | 0.0000                  | D16 045  | D12 022  | 0.0072                  | D23 009  | D16 008  | 0.0175                  | D33 006  | D16 005  | 0.0165                  | D36 003  | D23 009  | 0.0154                  |
| D16 030  | D12 022  | 0.0072                  | D16 045  | D16 004  | 0.0062                  | D23 009  | D16 009  | 0.0175                  | D33 006  | D16 008  | 0.0160                  | D36 003  | D23 012  | 0.0129                  |
| D16 030  | D16 004  | 0.0062                  | D16 045  | D16 005  | 0.0015                  | D23 009  | D16 027  | 0.0175                  | D33 006  | D16 009  | 0.0160                  | D36 003  | D33 006  | 0.0129                  |
| D16 030  | D16 005  | 0.0015                  | D16 045  | D16 008  | 0.0000                  | D23 009  | D16 030  | 0.0175                  | D33 006  | D16 027  | 0.0160                  |          |          |                         |
| D16 030  | D16 008  | 0.0000                  | D16 045  | D16 009  | 0.0000                  | D23 009  | D16 042  | 0.0175                  | D33 006  | D16 030  | 0.0160                  |          |          |                         |
| D16 030  | D16 009  | 0.0000                  | D16 045  | D16 027  | 0.0000                  | D23 009  | D16 044  | 0.0175                  | D33 006  | D16 042  | 0.0160                  |          |          |                         |
| D16 030  | D16 027  | 0.0000                  | D16 045  | D16 030  | 0.0000                  | D23 009  | D16 045  | 0.0175                  | D33 006  | D16 044  | 0.0160                  |          |          |                         |
| D16 042  | D12 022  | 0.0072                  | D16 045  | D16 042  | 0.0000                  | D23 009  | D20 027  | 0.0144                  | D33 006  | D16 045  | 0.0160                  |          |          |                         |

C5 18SV, ITS and *rbcL* combined, compared to Genbank sequences

| Strain 1 | Strain 2 | uncorrected p-distance | Strain 1 | Strain 2 | uncorrected p-distance | Strain 1 | Strain 2 | uncorrected p-distance | Strain 1 | Strain 2 | uncorrected p-distance | Strain 1 | Strain 2 | uncorrected p-distance |
|----------|----------|------------------------|----------|----------|------------------------|----------|----------|------------------------|----------|----------|------------------------|----------|----------|------------------------|
| TCC429   | D12 022  | 0.0231                 | TCC492   | D16 030  | 0.0164                 | TCC612   | D33 006  | 0.0123                 | TCC725   | D12 022  | 0.0200                 | TCC736   | D16 005  | 0.0133                 |
| TCC429   | D13 034  | 0.0185                 | TCC492   | D16 042  | 0.0164                 | TCC612   | D36 003  | 0.0036                 | TCC725   | D13 034  | 0.0159                 | TCC736   | D16 008  | 0.0128                 |
| TCC429   | D16 004  | 0.0221                 | TCC492   | D16 044  | 0.0164                 | TCC612   | TCC429   | 0.0138                 | TCC725   | D16 004  | 0.0195                 | TCC736   | D16 009  | 0.0128                 |
| TCC429   | D16 005  | 0.0185                 | TCC492   | D16 045  | 0.0164                 | TCC612   | TCC492   | 0.0133                 | TCC725   | D16 005  | 0.0159                 | TCC736   | D16 027  | 0.0128                 |
| TCC429   | D16 008  | 0.0179                 | TCC492   | D20 027  | 0.0134                 | TCC664   | D12 022  | 0.0138                 | TCC725   | D16 008  | 0.0154                 | TCC736   | D16 030  | 0.0128                 |
| TCC429   | D16 009  | 0.0179                 | TCC492   | D23 012  | 0.0056                 | TCC664   | D13 034  | 0.0092                 | TCC725   | D16 009  | 0.0154                 | TCC736   | D16 042  | 0.0128                 |
| TCC429   | D16 027  | 0.0179                 | TCC492   | D33 006  | 0.0154                 | TCC664   | D16 004  | 0.0128                 | TCC725   | D16 027  | 0.0154                 | TCC736   | D16 044  | 0.0128                 |
| TCC429   | D16 030  | 0.0179                 | TCC492   | D36 003  | 0.0139                 | TCC664   | D16 005  | 0.0092                 | TCC725   | D16 030  | 0.0154                 | TCC736   | D16 045  | 0.0128                 |
| TCC429   | D16 042  | 0.0179                 | TCC492   | TCC429   | 0.0139                 | TCC664   | D16 008  | 0.0087                 | TCC725   | D16 042  | 0.0154                 | TCC736   | D20 027  | 0.0113                 |
| TCC429   | D16 044  | 0.0179                 | TCC612   | D12 022  | 0.0143                 | TCC664   | D16 009  | 0.0087                 | TCC725   | D16 044  | 0.0154                 | TCC736   | D23 012  | 0.0113                 |
| TCC429   | D16 045  | 0.0179                 | TCC612   | D13 034  | 0.0097                 | TCC664   | D16 027  | 0.0087                 | TCC725   | D16 045  | 0.0154                 | TCC736   | D33 006  | 0.0128                 |
| TCC429   | D20 027  | 0.0143                 | TCC612   | D16 004  | 0.0133                 | TCC664   | D16 030  | 0.0087                 | TCC725   | D20 027  | 0.0123                 | TCC736   | D36 003  | 0.0118                 |
| TCC429   | D23 012  | 0.0129                 | TCC612   | D16 005  | 0.0097                 | TCC664   | D16 042  | 0.0087                 | TCC725   | D23 012  | 0.0026                 | TCC736   | TCC429   | 0.0107                 |
| TCC429   | D33 006  | 0.0046                 | TCC612   | D16 008  | 0.0092                 | TCC664   | D16 044  | 0.0087                 | TCC725   | D33 006  | 0.0144                 | TCC736   | TCC492   | 0.0118                 |
| TCC429   | D36 003  | 0.0143                 | TCC612   | D16 009  | 0.0092                 | TCC664   | D16 045  | 0.0087                 | TCC725   | D36 003  | 0.0128                 | TCC736   | TCC612   | 0.0102                 |
| TCC492   | D12 022  | 0.0211                 | TCC612   | D16 027  | 0.0092                 | TCC664   | D20 027  | 0.0020                 | TCC725   | TCC429   | 0.0129                 | TCC736   | TCC664   | 0.0097                 |
| TCC492   | D13 034  | 0.0169                 | TCC612   | D16 030  | 0.0092                 | TCC664   | D23 012  | 0.0113                 | TCC725   | TCC492   | 0.0031                 | TCC736   | TCC725   | 0.0118                 |
| TCC492   | D16 004  | 0.0205                 | TCC612   | D16 042  | 0.0092                 | TCC664   | D33 006  | 0.0118                 | TCC725   | TCC612   | 0.0123                 |          |          |                        |
| TCC492   | D16 005  | 0.0169                 | TCC612   | D16 044  | 0.0092                 | TCC664   | D36 003  | 0.0031                 | TCC725   | TCC664   | 0.0118                 |          |          |                        |
| TCC492   | D16 008  | 0.0164                 | TCC612   | D16 045  | 0.0092                 | TCC664   | TCC429   | 0.0133                 | TCC736   | D12 022  | 0.0190                 |          |          |                        |
| TCC492   | D16 009  | 0.0164                 | TCC612   | D20 027  | 0.0026                 | TCC664   | TCC492   | 0.0128                 | TCC736   | D13 034  | 0.0133                 |          |          |                        |
| TCC492   | D16 027  | 0.0164                 | TCC612   | D23 012  | 0.0118                 | TCC664   | TCC612   | 0.0005                 | TCC736   | D16 004  | 0.0169                 |          |          |                        |

**C6 Clade 2: Individual p-Distances for 18SV, ITS and *rbcl* compared to Genbank sequences**

| 18S      |          |                        | ITS      |          |                        | <i>rbcl</i> |          |                        |
|----------|----------|------------------------|----------|----------|------------------------|-------------|----------|------------------------|
| Strain 1 | Strain 2 | uncorrected p-Distance | Strain 1 | Strain 2 | uncorrected p-Distance | Strain 1    | Strain 2 | uncorrected p-Distance |
| D36 003  | D20 027  | 0.0000                 | D36 003  | D20 027  | 0.0064                 | D20 027     | D03 167  | 0.0022                 |
| D03 167  | D20 027  | 0.0000                 | TCC664   | D20 027  | 0.0032                 | D36 003     | D03 167  | 0.0000                 |
| D03 167  | D36 003  | 0.0000                 | TCC664   | D36 003  | 0.0097                 | D36 003     | D20 027  | 0.0022                 |
| TCC595   | D20 027  | 0.0000                 | TCC612   | D20 027  | 0.0048                 | TCC595      | D03 167  | 0.0000                 |
| TCC595   | D36 003  | 0.0000                 | TCC612   | D36 003  | 0.0113                 | TCC595      | D20 027  | 0.0022                 |
| TCC595   | D03 167  | 0.0000                 | TCC612   | TCC664   | 0.0016                 | TCC595      | D36 003  | 0.0000                 |
| TCC612   | D20 027  | 0.0000                 | TCC595   | D20 027  | 0.0032                 | TCC612      | D03 167  | 0.0011                 |
| TCC612   | D36 003  | 0.0000                 | TCC595   | D36 003  | 0.0097                 | TCC612      | D20 027  | 0.0032                 |
| TCC612   | D03 167  | 0.0000                 | TCC595   | TCC664   | 0.0000                 | TCC612      | D36 003  | 0.0011                 |
| TCC612   | TCC595   | 0.0000                 | TCC595   | TCC612   | 0.0016                 | TCC612      | TCC595   | 0.0011                 |
| TCC664   | D20 027  | 0.0000                 |          |          |                        | TCC664      | D03 167  | 0.0000                 |
| TCC664   | D36 003  | 0.0000                 |          |          |                        | TCC664      | D20 027  | 0.0022                 |
| TCC664   | D03 167  | 0.0000                 |          |          |                        | TCC664      | D36 003  | 0.0000                 |
| TCC664   | TCC595   | 0.0000                 |          |          |                        | TCC664      | TCC595   | 0.0000                 |
| TCC664   | TCC612   | 0.0000                 |          |          |                        | TCC664      | TCC612   | 0.0011                 |

**C7 Clade 3: Individual p-Distances for 18SV, ITS and *rbcL* compared to Genbank sequences**

| 18S      |          |                        | ITS      |          |                        | <i>rbcL</i> |          |                        |
|----------|----------|------------------------|----------|----------|------------------------|-------------|----------|------------------------|
| Strain 1 | Strain 2 | uncorrected p-distance | Strain 1 | Strain 2 | uncorrected p-distance | Strain 1    | Strain 2 | uncorrected p-distance |
| D33 024  | D33 006  | 0.0027                 | TCC429   | D33 006  | 0.0143                 | D33 024     | D33 006  | 0.0000                 |
| TCC429   | D33 006  | 0.0027                 | TCC736   | D33 006  | 0.0333                 | TCC429      | D33 006  | 0.0000                 |
| TCC429   | D33 024  | 0.0053                 | TCC736   | TCC429   | 0.0263                 | TCC429      | D33 024  | 0.0000                 |
| TCC736   | D33 006  | 0.0053                 |          |          |                        | TCC736      | D33 006  | 0.0061                 |
| TCC736   | D33 024  | 0.0080                 |          |          |                        | TCC736      | D33 024  | 0.0061                 |
| TCC736   | TCC429   | 0.0027                 |          |          |                        | TCC736      | TCC429   | 0.0061                 |



**C8 Clade 4: Individual p-Distances for 18SV, ITS and *rbcL* compared to Genbank sequences**

| <b>18S</b> |          |                        | <b>ITS</b> |          |                        | <b><i>rbcL</i></b> |          |                        |
|------------|----------|------------------------|------------|----------|------------------------|--------------------|----------|------------------------|
| Strain 1   | Strain 2 | uncorrected p-distance | Strain 1   | Strain 2 | uncorrected p-distance | Strain 1           | Strain 2 | uncorrected p-distance |
| D23 012    | D23 009  | 0.0000                 | D23 012    | D23 009  | 0.0119                 | D23 012            | D23 009  | 0.0000                 |
| TCC492     | D23 009  | 0.0000                 | TCC734     | D23 009  | 0.0172                 | TCC492             | D23 009  | 0.0065                 |
| TCC492     | D23 012  | 0.0000                 | TCC734     | D23 012  | 0.0086                 | TCC492             | D23 012  | 0.0065                 |
| TCC734     | D23 009  | 0.0000                 | TCC725     | D23 009  | 0.0172                 | TCC725             | D23 009  | 0.0000                 |
| TCC734     | D23 012  | 0.0000                 | TCC725     | D23 012  | 0.0086                 | TCC725             | D23 012  | 0.0000                 |
| TCC734     | TCC492   | 0.0000                 | TCC725     | TCC734   | 0.0000                 | TCC725             | TCC492   | 0.0065                 |
| TCC725     | D23 009  | 0.0000                 | TCC492     | D23 009  | 0.0172                 | TCC734             | D23 009  | 0.0000                 |
| TCC725     | D23 012  | 0.0000                 | TCC492     | D23 012  | 0.0086                 | TCC734             | D23 012  | 0.0000                 |
| TCC725     | TCC492   | 0.0000                 | TCC492     | TCC734   | 0.0000                 | TCC734             | TCC492   | 0.0065                 |
| TCC725     | TCC734   | 0.0000                 | TCC492     | TCC725   | 0.0000                 | TCC734             | TCC725   | 0.0000                 |
